# Supplementary material for: von Willebrand factor mutation promotes thrombocytopathy by inhibiting integrin αIIbβ3
Source: JCI journal article supplement (doi:10.1172/jci69458), 2013-11-24
Supplement: sd1 [file 1]

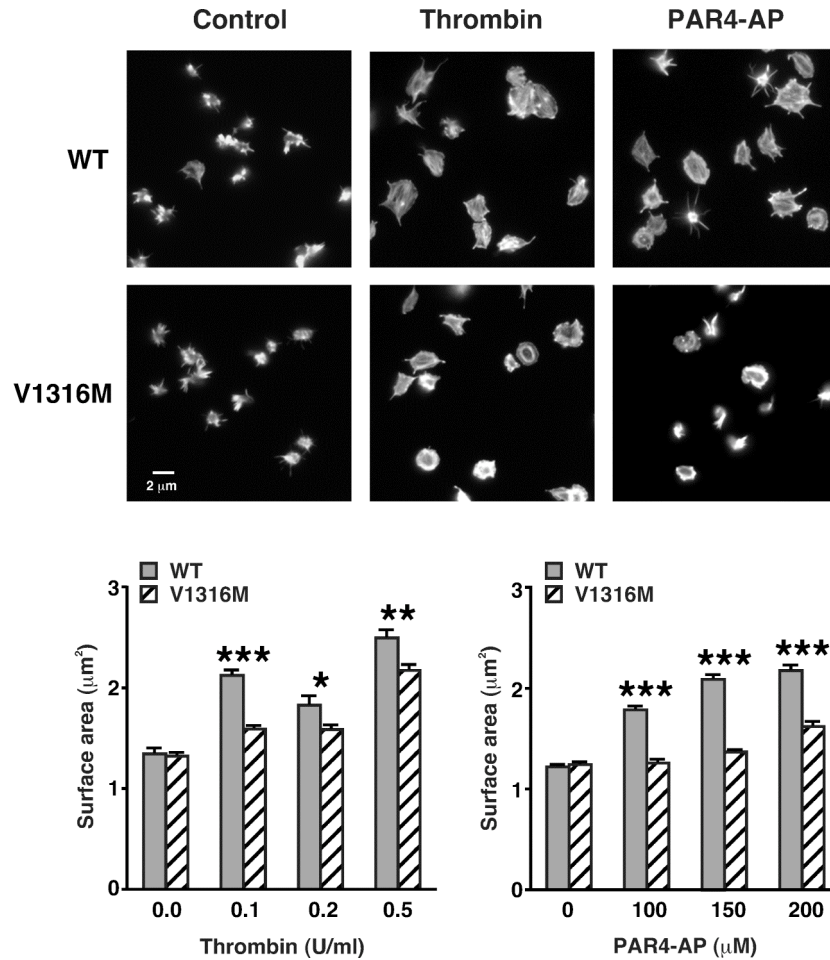

### Figure S1: Platelet spreading in mVWF/V1316M

Platelet suspensions from mVWF/V1316M or WT were stimulated with either thrombin (0.1 to 0.5 U/ml) or PAR4-AP (100 to 200 µM) and immediately plated for 30 min at room temperature onto coverslips precoated with fibrinogen (100 µg/ml). Platelets were stained with Alexa Fluor 488-labeled phalloidin. The surface area was quantified as described under Material and Methods. Data are expressed as the means ± SEM of at least 20 determinations and are representative of 2 independent experiments; \*\*P < 0.01; \*\*\*P < 0.001 (unpaired Student's *t* test).

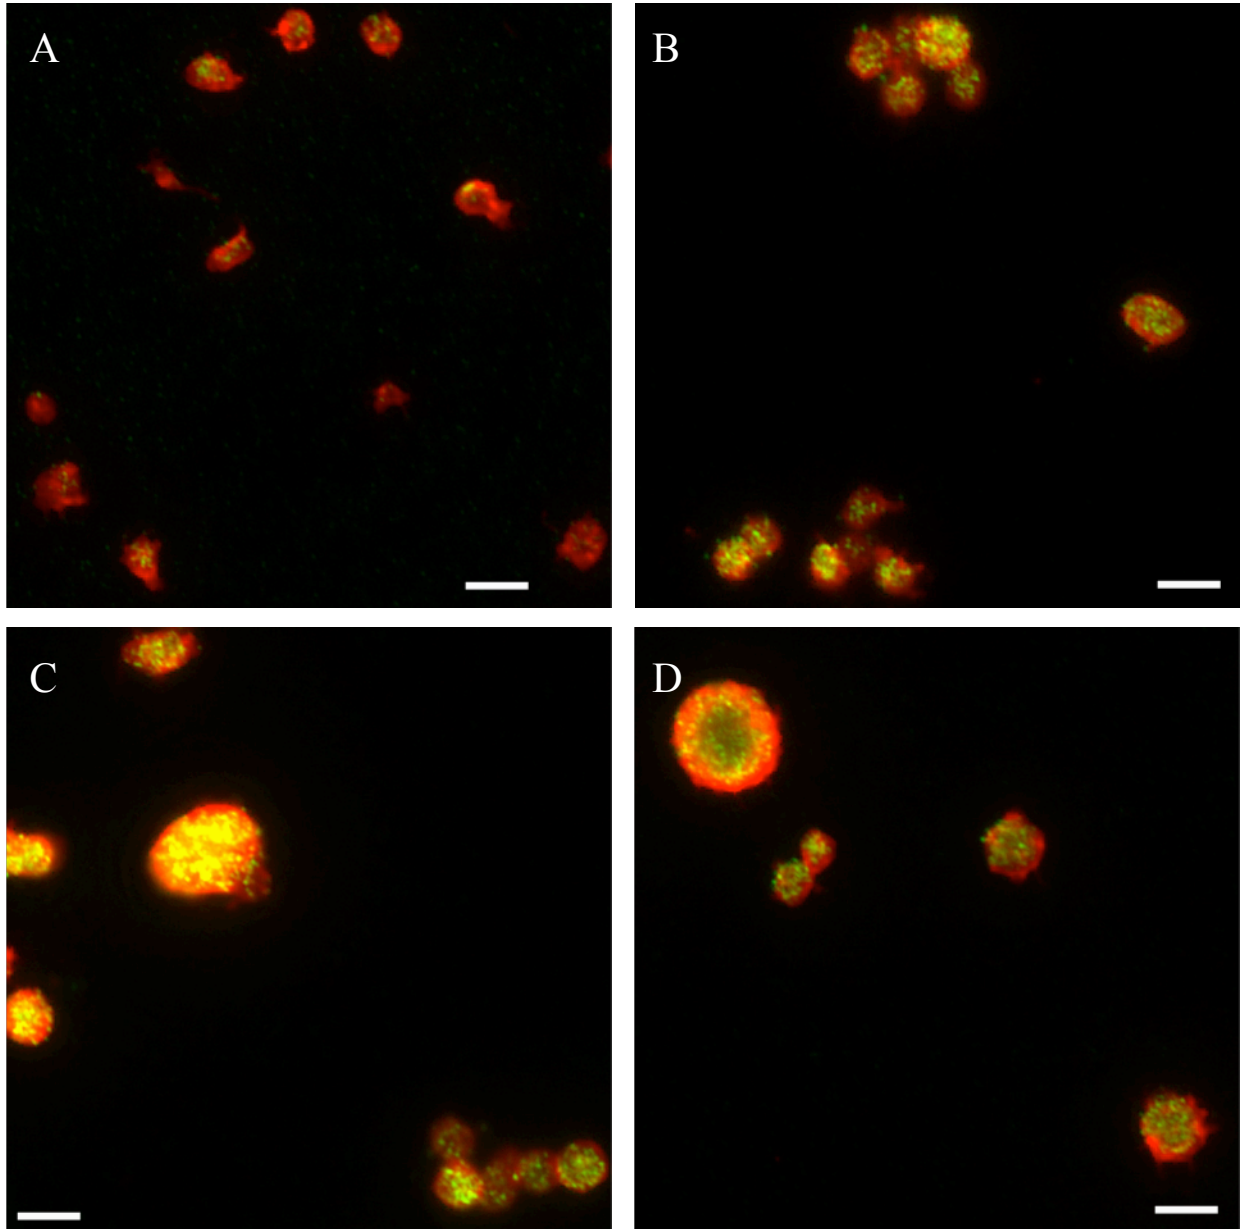

**Figure S2: Binding of VWF/pV1316M to patient's platelets**

Control and p.V1316M PRP were isolated as described in Material and Methods and smears were prepared with 5 $\mu$ l of this preparation. Unpermeabilized platelets were detected by staining for the  $\alpha$ IIb subunit of integrin  $\alpha$ IIb $\beta$ 3 (CD41, red) (Monoclonal Mouse anti-Human CD41 followed by AlexaFluor 546-Goat anti-Mouse secondary antibody). VWF (green) was revealed by staining with a Rabbit anti-Human VWF followed by AlexaFluor 488-Goat anti-Rabbit secondary antibody. (A) In control platelets, numerous regular platelets with barely detectable VWF staining were found. (B-D) In the patient carrying the p.V1316M/VWF mutation, the majority of the platelets were enlarged and small platelets aggregates were also detectable. Note the strong labeling for VWF in panels B-D. Original magnification was 100x. Scale bar is 5 $\mu$ m.

## Normal platelets: Recombinant hVWF/p.V1316M

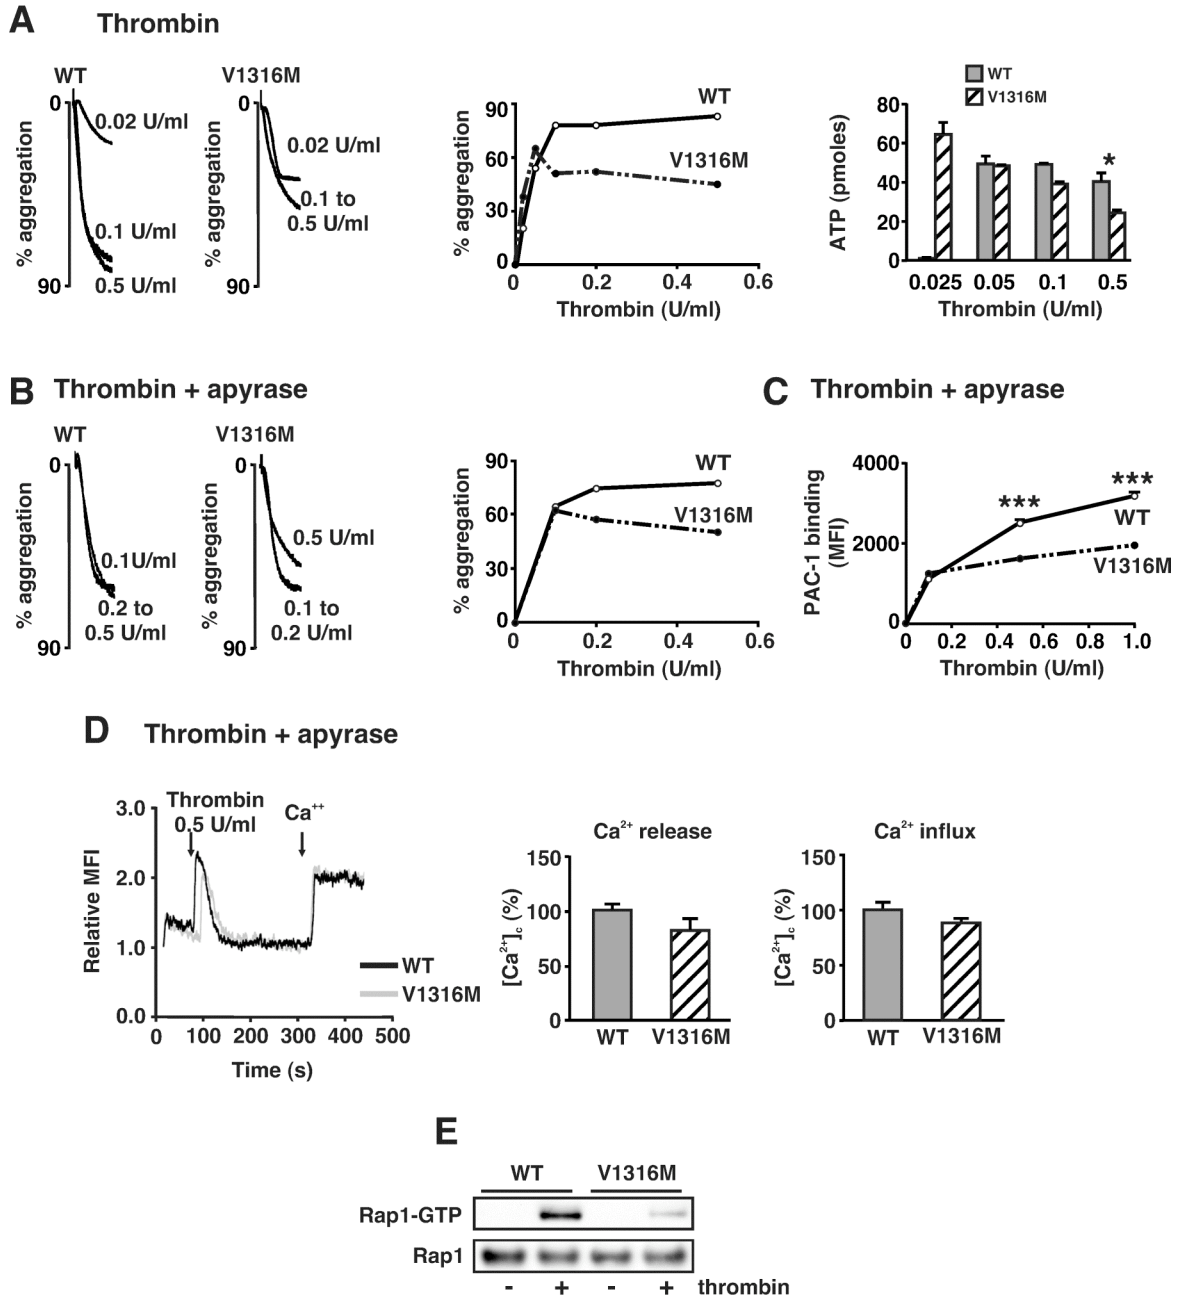

**Figure S3: Thrombin-induced activation of human control platelets pretreated with recombinant hVWF/p.V1316M**

Washed human control platelet pretreated for 10 minutes with recombinant hVWF/p.V1316M or WT were stimulated with thrombin in the (A) absence or (B,C, D) presence of apyrase (2U/ml) or (E) in the presence of the antagonists of ADP receptors (AR-C69931MX: 10  $\mu$ M and MRS 2179: 10  $\mu$ M). (A) Aggregation and secretion of washed platelets were initiated by adding various concentrations of thrombin (0.02U/ml to 0.5U/ml). Dense granule secretion was assessed by measuring the amount of ATP release (pmoles). (C) Integrin  $\alpha$ IIb $\beta$ 3 activation induced by thrombin (0.1 U/ml to 1.0 U/ml) was assessed by flow cytometry using integrin  $\alpha$ IIb $\beta$ 3 mAb (PAC1) specific for the activated conformation of the human integrin. The level of activated integrin is indicated by the mean fluorescence intensities (MFI). (D) Thrombin induced Ca<sup>2+</sup> signaling was monitored by flow cytometry using the Oregon Green-488 BAPTA1-AM. Histograms represent the area under the curve of both the Ca<sup>2+</sup> store release and Ca<sup>2+</sup> influx. (E) Rap1 activity was measured by pull-down assay after 30 s of stimulation with thrombin(0.5 U/ml) in the absence of stirring. Data from one experiment done in triplicate are presented as mean  $\pm$  SEM; \*P<0. 05, \*\*\*P<0.001 (unpaired Student's *t* test). Results are representative of 3 independent experiments.

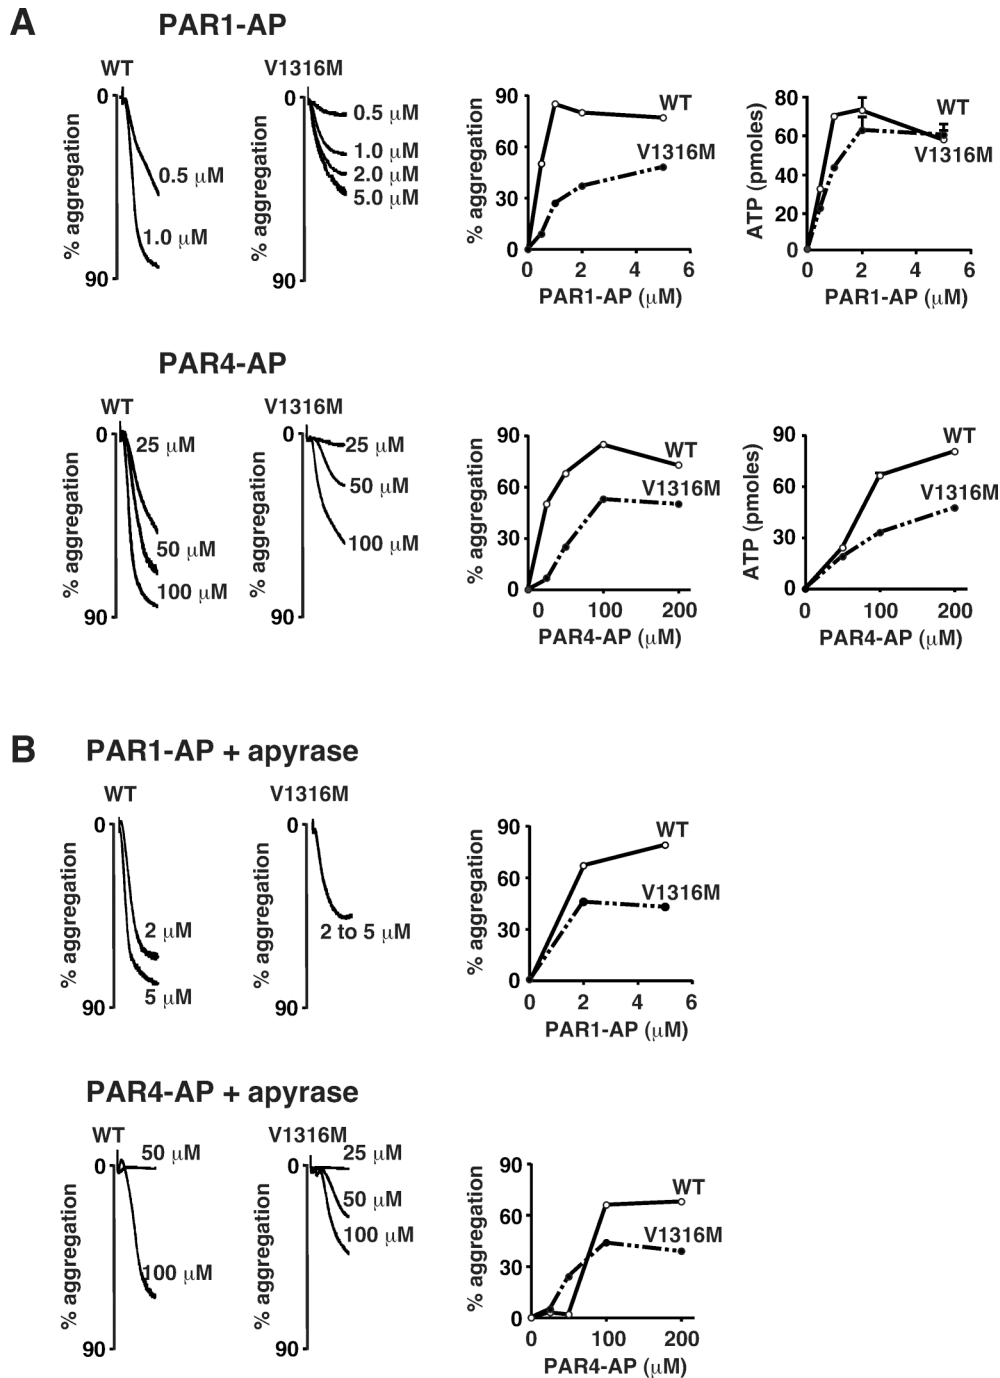

**Figure S4: Aggregation and secretion of human control platelets induced by PAR1-AP and PAR4-AP after pretreatment with recombinant hVWF/p.V1316M.**

Human control platelet suspensions were pretreated for 10 minutes with recombinant hVWF/p.V1316M or WT in the (A) absence or (B) presence of apyrase (2U/ml). Aggregation and secretion of washed platelets were initiated by adding various concentrations of PAR1-AP (0.5  $\mu$ M to 5  $\mu$ M) and PAR4-AP (25  $\mu$ M to 200  $\mu$ M). Dense granule secretion was assessed by measuring ATP release. Results are representative of 3 independent experiments.

## A Collagen

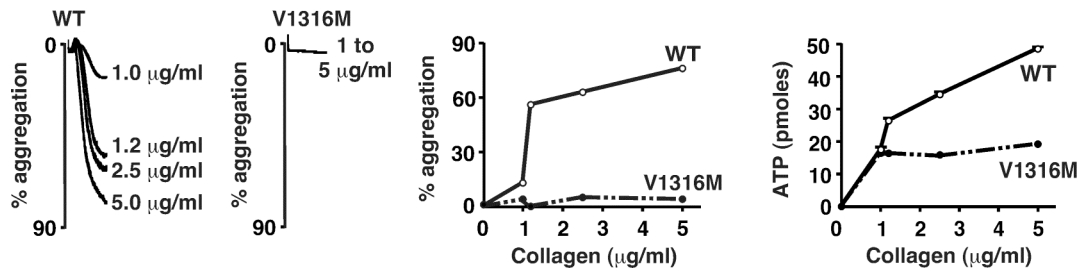

## B Collagen + apyrase

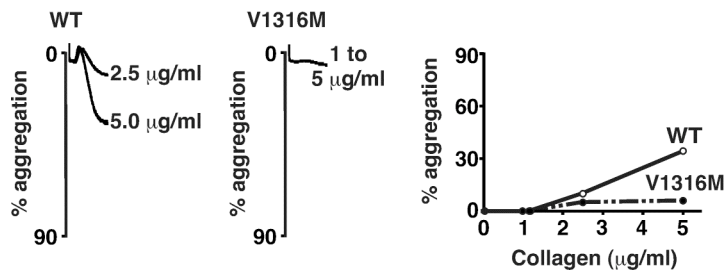

**Figure S5: Aggregation and secretion of human control platelets induced by collagen after pretreatment with recombinant hVWF/p.V1316M.**

Human control platelet suspensions were pretreated for 10 minutes with recombinant hVWF/p.V1316M or WT in the (A) absence or (B) presence of apyrase (2U/ml). Aggregation and secretion of washed platelets were initiated by adding various concentrations of collagen (1 µg/ml to 5 µg/ml). Dense granule secretion was assessed by measuring ATP release. Results are representative of 3 independent experiments.
